# Supplementary material for: Occurrence and Probabilistic Risk Assessment of Fumonisin B1, Fumonisin B2 and Deoxynivalenol in Nixtamalized Maize in Mexico City
Source: MDPI journal article supplement (doi:10.3390/toxins12100644), 2020-10-06
Supplement: s1 [file s1]

# Supplementary Materials: Occurrence and Probabilistic Risk Assessment of Fumonisin B1, Fumonisin B2 and Deoxynivalenol in Nixtamalized Maize in Mexico City

Ixchel Gilbert-Sandoval, Sebastiaan Wesseling and Ivonne M.C.M. Rietjens

**Table 1.** Concentrations of mycotoxins fumonisin B1 (FB1), fumonisin B2 (FB2) and deoxynivalenol (DON) in the nixtamalized maize samples analyzed (mean of duplicates).

| Sample | FB1 (ng/g)       | FB2 (ng/g) | DON (ng/g) | Sample | FB1 (ng/g) | FB2 (ng/g) | DON (ng/g) | Sample | FB1 (ng/g) | FB2 (ng/g) | DON (ng/g) |
|--------|------------------|------------|------------|--------|------------|------------|------------|--------|------------|------------|------------|
| 1      | 357              | 292        | <LOD       | 11     | 376        | 181        | 158        | 21     | 440        | 250        | 73         |
| 2      | 316              | 236        | <LOD       | 12     | 222        | 141        | 63         | 22     | 173        | 125        | <LOD       |
| 3      | 691              | 352        | 154        | 13     | 515        | 242        | 100        | 23     | 500        | 340        | 78         |
| 4      | 254              | 123        | <LOD       | 14     | 382        | 216        | 81         | 24     | 543        | 301        | <LOD       |
| 5      | 194              | 132        | <LOD       | 15     | 667        | 310        | 320        | 25     | 114        | 117        | <LOD       |
| 6      | 318              | 233        | <LOD       | 16     | 267        | 183        | 43         | 26     | 130        | 90         | <LOD       |
| 7      | <LOD             | 24         | 43         | 17     | 402        | 167        | 92         | 27     | 415        | 209        | <LOD       |
| 8      | 79               | 49         | 111        | 18     | 459        | 210        | 376        | 28     | 573        | 260        | 250        |
| 9      | 415              | 246        | <LOD       | 19     | 979        | 397        | 355        | 29     | 482        | 255        | 92         |
| 10     | 669              | 309        | 85         | 20     | 439        | 307        | 55         | 30     | 168        | 155        | <LOD       |
| Sample | FB1 (ng/g)       | FB2 (ng/g) | DON (ng/g) | Sample | FB1 (ng/g) | FB2 (ng/g) | DON (ng/g) | Sample | FB1 (ng/g) | FB2 (ng/g) | DON (ng/g) |
| 31     | 217              | 146        | <LOD       | 43     | 463        | 215        | 383        | 55     | 486        | 214        | 41         |
| 32     | 583              | 339        | 277        | 44     | 786        | 267        | 239        | 56     | 420        | 133        | <LOD       |
| 33     | 352              | 298        | 143        | 45     | 551        | 140        | <LOD       | 57     | 598        | 206        | 81         |
| 34     | 289              | 115        | 170        | 46     | 358        | 152        | 161        | 58     | 267        | 98         | 137        |
| 35     | 214              | 216        | <LOD       | 47     | 606        | 151        | 57         | 59     | 994        | 300        | 182        |
| 36     | 218              | 130        | 62         | 48     | 642        | 160        | 120        | 60     | 942        | 330        | 74         |
| 37     | 398              | 203        | 75         | 49     | 1438       | 507        | 658        | 61     | 353        | 177        | 136        |
| 38     | 529              | 224        | 118        | 50     | 452        | 147        | 209        | 62     | 298        | 124        | 90         |
| 39     | 455              | 284        | 160        | 51     | 1044       | 524        | 291        | 63     | 876        | 262        | <LOD       |
| 40     | 538              | 321        | 200        | 52     | 613        | 245        | 78         | 64     | 437        | 122        | <LOD       |
| 41     | 691              | 328        | 143        | 53     | 244        | 101        | 154        |        |            |            |            |
| 42     | 748 <sup>a</sup> | 282        | 231        | 54     | 1589       | 482        | <LOD       |        |            |            |            |

<sup>a</sup> Sample analyzed one time for FB1. LOD, limit of detection

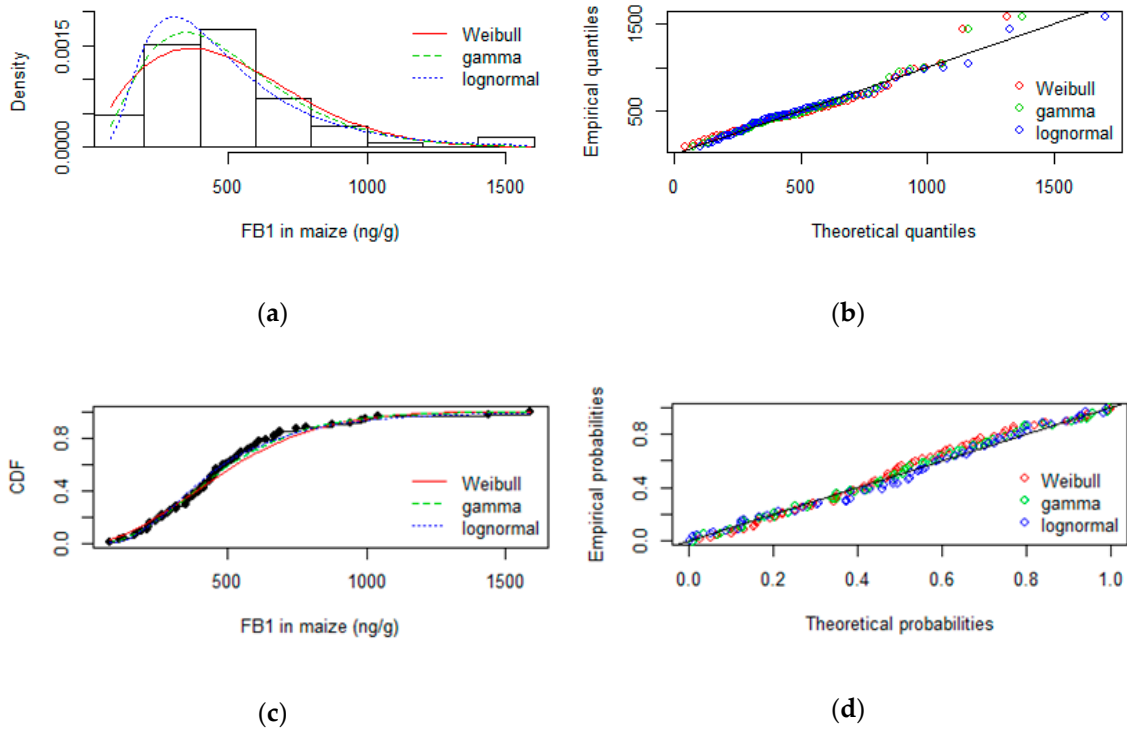

**Figure S1.** Goodness-of-fit plots for the distributions of the FB1 concentration in the nixtamalized maize samples. In order: **(a)** histogram of the empirical distribution data superimposed with the density function of the theoretical distribution; **(b)** plot of the quantiles of the theoretical fitted distribution (x-axis) against the empirical quantiles of the data (y-axis) (Q-Q plot); **(c)** plot of the cumulative density function of the fitted distribution (x-axis) against the empirical cumulative density function (y-axis) (P-P plot); **(d)** empirical density function of the data superimposed with the cumulative density function of the theoretical fitted distribution.

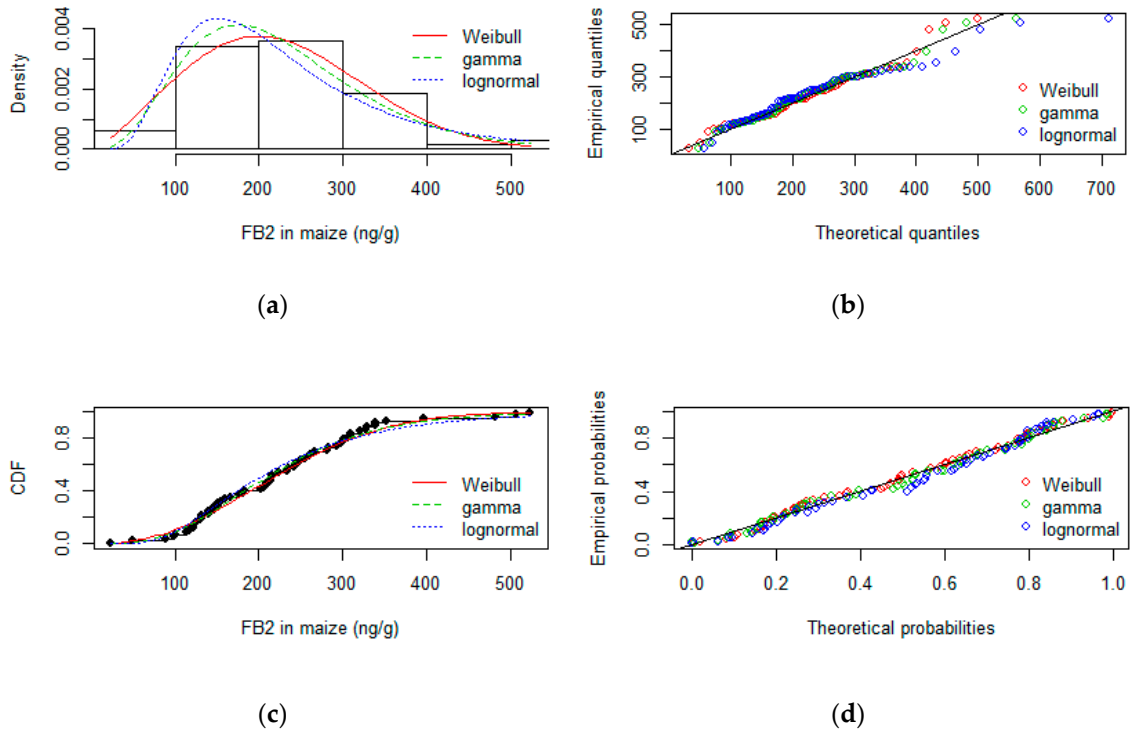

**Figure S2.** Goodness-of-fit plots for the distributions of the FB2 concentration in the nixtamalized maize samples. In order: **(a)** histogram of the empirical distribution data superimposed with the density function of the theoretical distribution; **(b)** plot of the quantiles of the theoretical fitted distribution (x-axis) against the empirical quantiles of the data (y-axis) (Q-Q plot); **(c)** plot of the cumulative density function of the fitted distribution (x-axis) against the empirical cumulative density function (y-axis) (P-P plot); **(d)** empirical density function of the data superimposed with the cumulative density function of the theoretical fitted distribution.

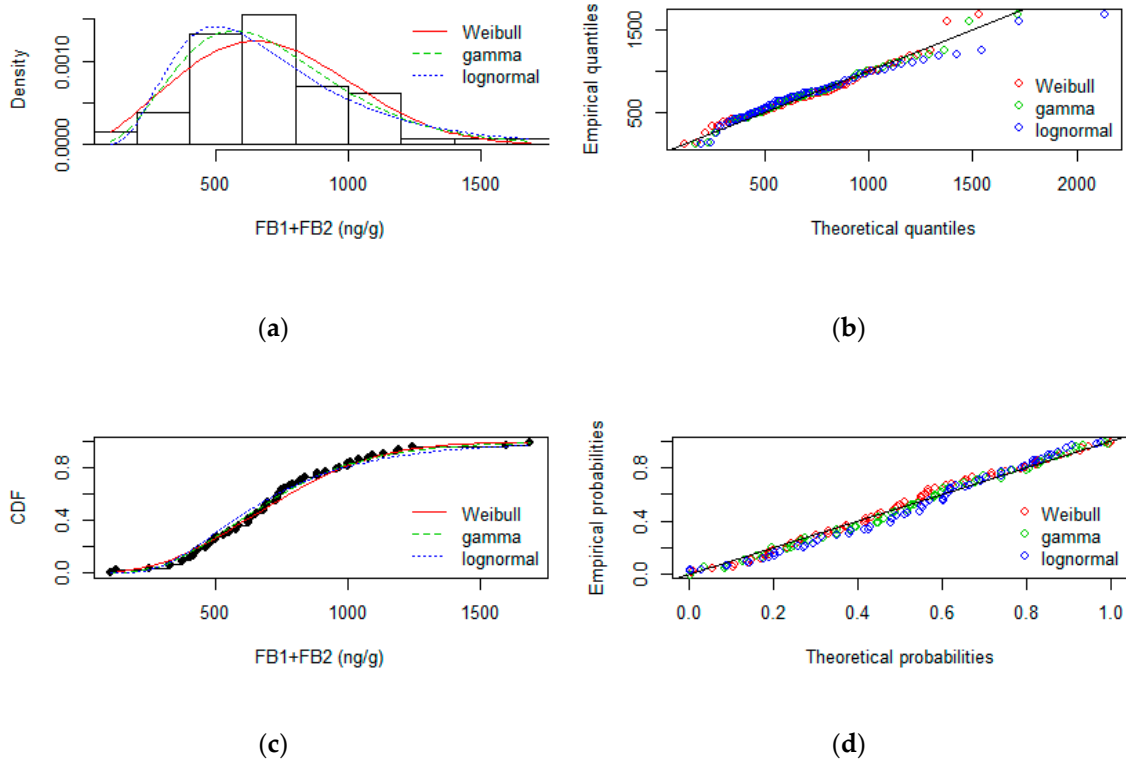

**Figure S3.** Goodness-of-fit plots for the distributions of the sum of FB1+FB2 concentration in the nixtamalized maize samples. In order: (a) histogram of the empirical distribution data superimposed with the density function of the theoretical distribution; (b) plot of the quantiles of the theoretical fitted distribution (x-axis) against the empirical quantiles of the data (y-axis) (Q-Q plot); (c) plot of the cumulative density function of the fitted distribution (x-axis) against the empirical cumulative density function (y-axis) (P-P plot); (d) empirical density function of the data superimposed with the cumulative density function of the theoretical fitted distribution.

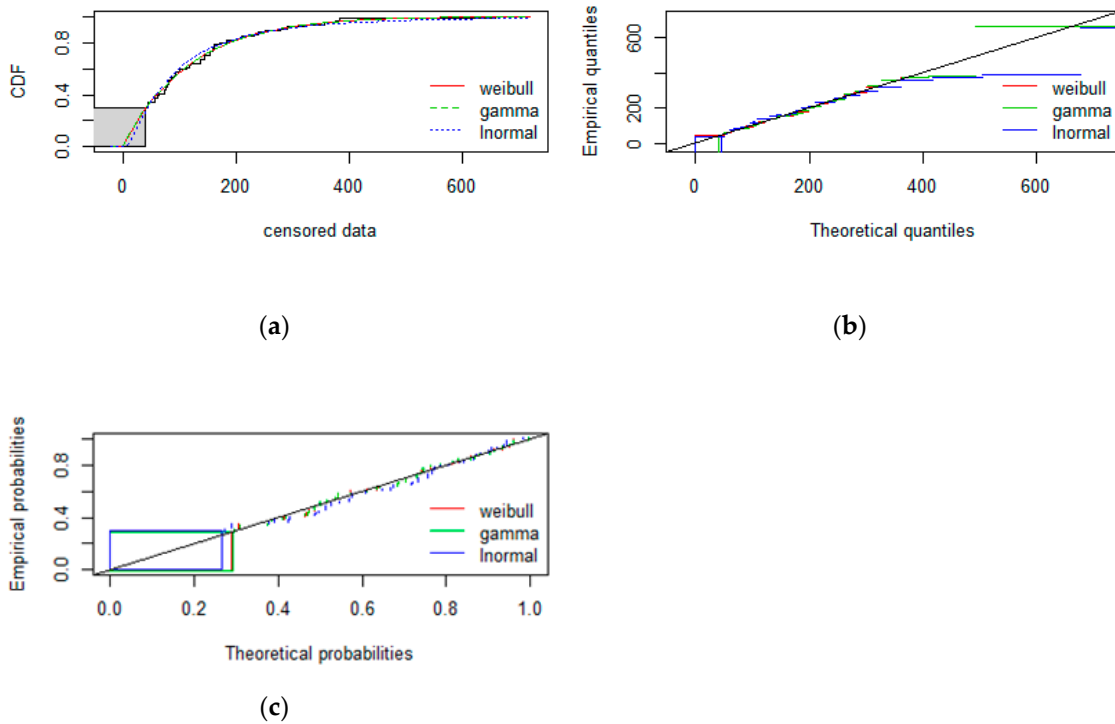

**Figure S4.** Goodness-of-fit plots for the distributions of the DON concentration in the nixtamalized maize samples. In order: (i) empirical density function of the data superimposed with the cumulative density function of the theoretical fitted distribution; (ii) plot of the quantiles of the theoretical fitted distribution (x-axis) against the empirical quantiles of the data (y-axis) (Q-Q plot); (iii) plot of the cumulative density function of the fitted distribution (x-axis) against the empirical cumulative density function (y-axis) (P-P plot).

**Table S2.** Model selection criteria based on the loglikelihood Akaike and Schwarz's Bayesian information criteria for the mycotoxin dataset.

| Dataset | Distribution | AIC/BIC     |
|---------|--------------|-------------|
| FB1     | Gamma        | 895.5/899.8 |
|         | Lognormal    | 905.5/909.8 |
|         | Weibull      | 896.7/901.0 |
| FB2     | Gamma        | 773.2/777.5 |
|         | Lognormal    | 781.0/785.3 |
|         | Weibull      | 772.9/777.2 |
| FB1+FB2 | Gamma        | 927.2/931.5 |
|         | Lognormal    | 927.5/931.8 |
|         | Weibull      | 932.5/936.8 |
| DON     | Gamma        | 602.7/607.0 |
|         | Lognormal    | 606.2/610.5 |
|         | Weibull      | 602.7/607.0 |

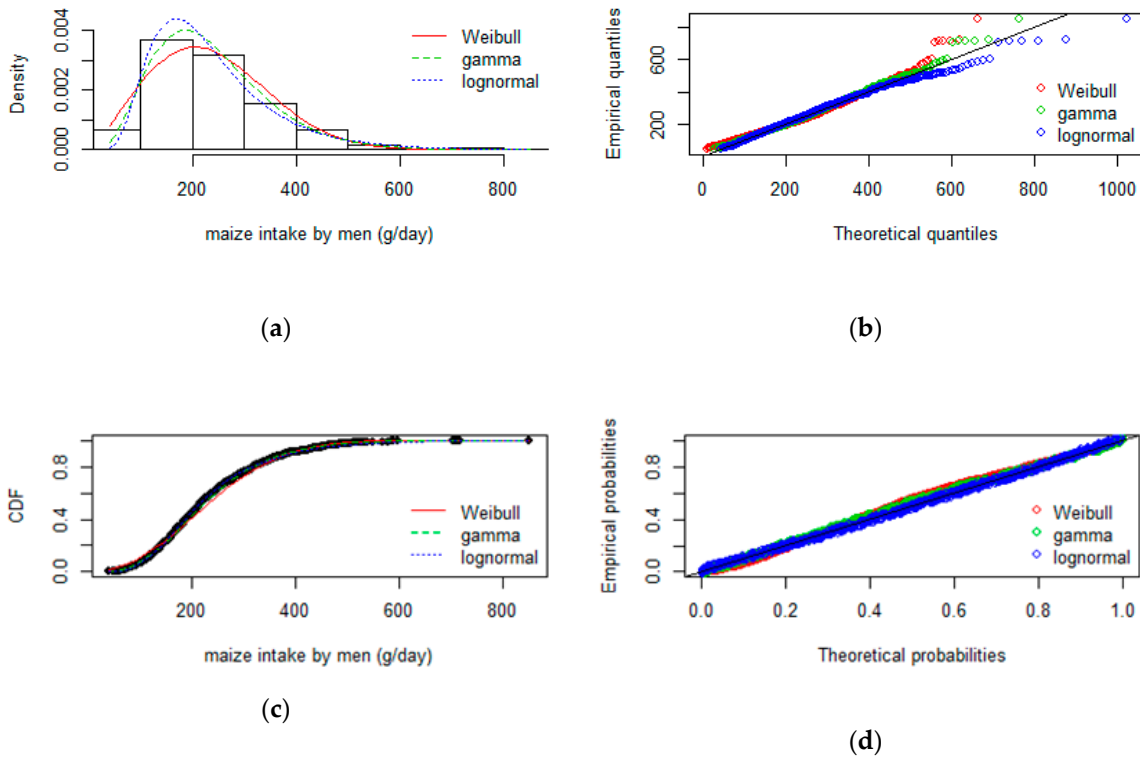

**Figure S5.** Goodness-of-fit plots for the distribution of the nixtamalized maize consumed daily by men. In order: (a) histogram of the empirical distribution data superimposed with the density function of the theoretical distribution; (b) plot of the quantiles of the theoretical fitted distribution (x-axis) against the empirical quantiles of the data (y-axis) (Q-Q plot); (c) plot of the cumulative density function of the fitted distribution (x-axis) against the empirical cumulative density function (y-axis) (P-P plot); (d) empirical density function of the data superimposed with the cumulative density function of the theoretical fitted distribution.

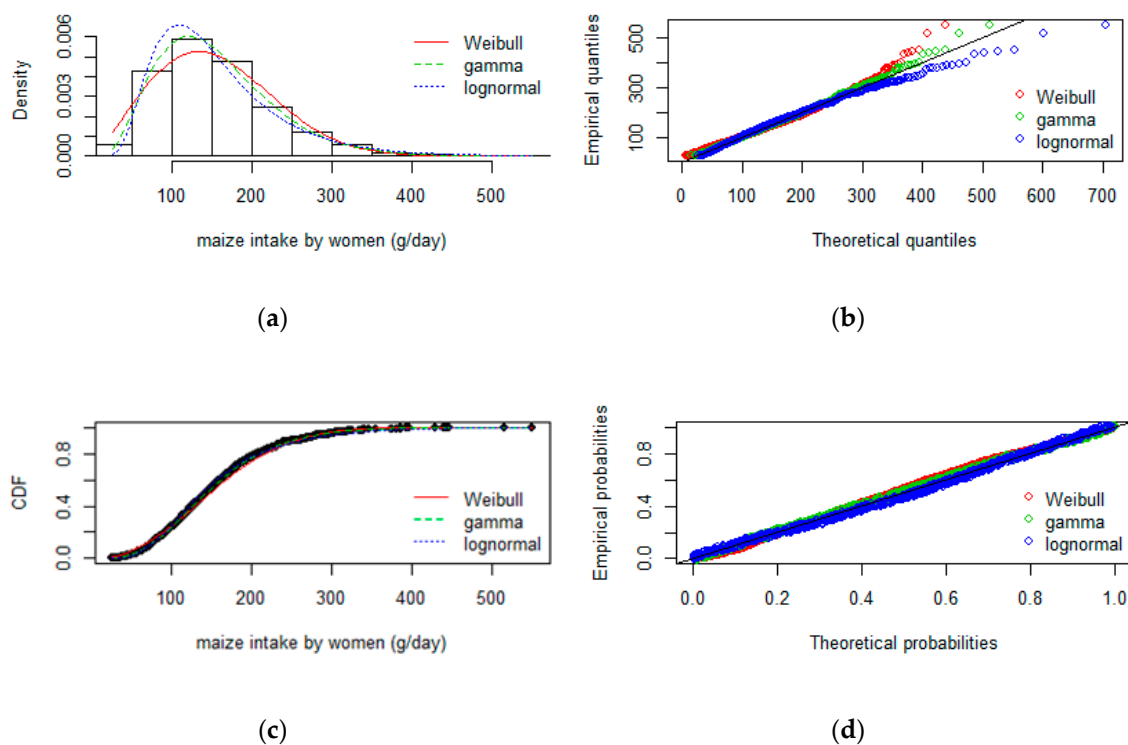

**Figure S6.** Goodness-of-fit plots for the distribution of the nixtamalized maize consumed daily by women. In order: (a) histogram of the empirical distribution data superimposed with the density function of the theoretical distribution; (b) plot of the quantiles of the theoretical fitted distribution (x-axis) against the empirical quantiles of the data (y-axis) (Q-Q plot); (c) plot of the cumulative density function of the fitted distribution (x-axis) against the empirical cumulative density function (y-axis) (P-P plot); (d) empirical density function of the data superimposed with the cumulative density function of the theoretical fitted distribution.

**Table S3.** Model selection criteria based on the loglikelihood Akaike and Schwarz's Bayesian information criteria for the sum of the nixtamalized maize products dataset.

| Dataset | Distribution | AIC/BIC         |
|---------|--------------|-----------------|
| Men     | Gamma        | 12064.8/12074.6 |
|         | Lognormal    | 12051.6/12061.4 |
|         | Weibull      | 12169.0/12178.8 |
| Women   | Gamma        | 11226.0/11235.8 |
|         | Lognormal    | 11222.2/11232.1 |
|         | Weibull      | 11309.0/11318.8 |

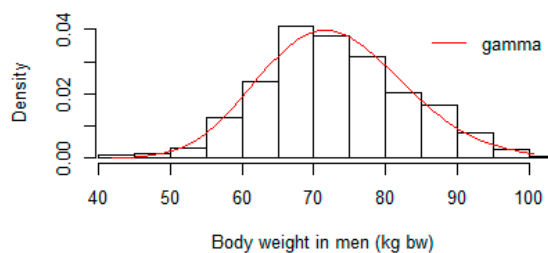

(a)

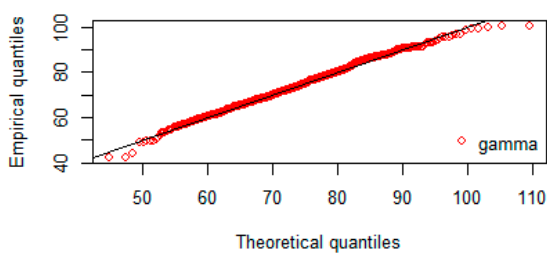

(b)

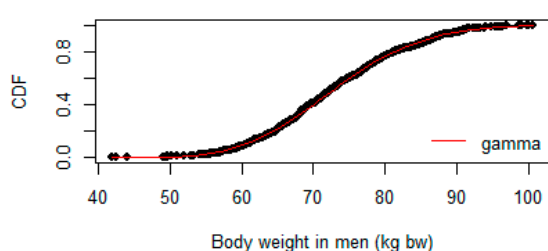

(c)

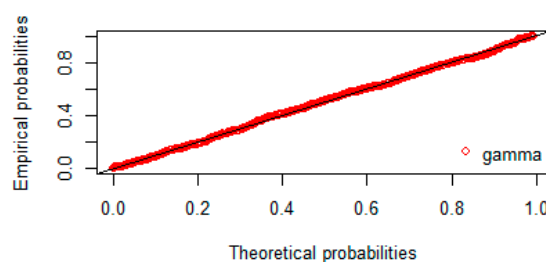

(d)

**Figure S7.** Goodness-of-fit plots for the distributions of the body weight in men. In order: (a) histogram of the empirical distribution data superimposed with the density function of the theoretical distribution; (b) plot of the quantiles of the theoretical fitted distribution (x-axis) against the empirical quantiles of the data (y-axis) (Q-Q plot); (c) plot of the cumulative density function of the fitted distribution (x-axis) against the empirical cumulative density function (y-axis) (P-P plot); (d) empirical density function of the data superimposed with the cumulative density function of the theoretical fitted distribution.



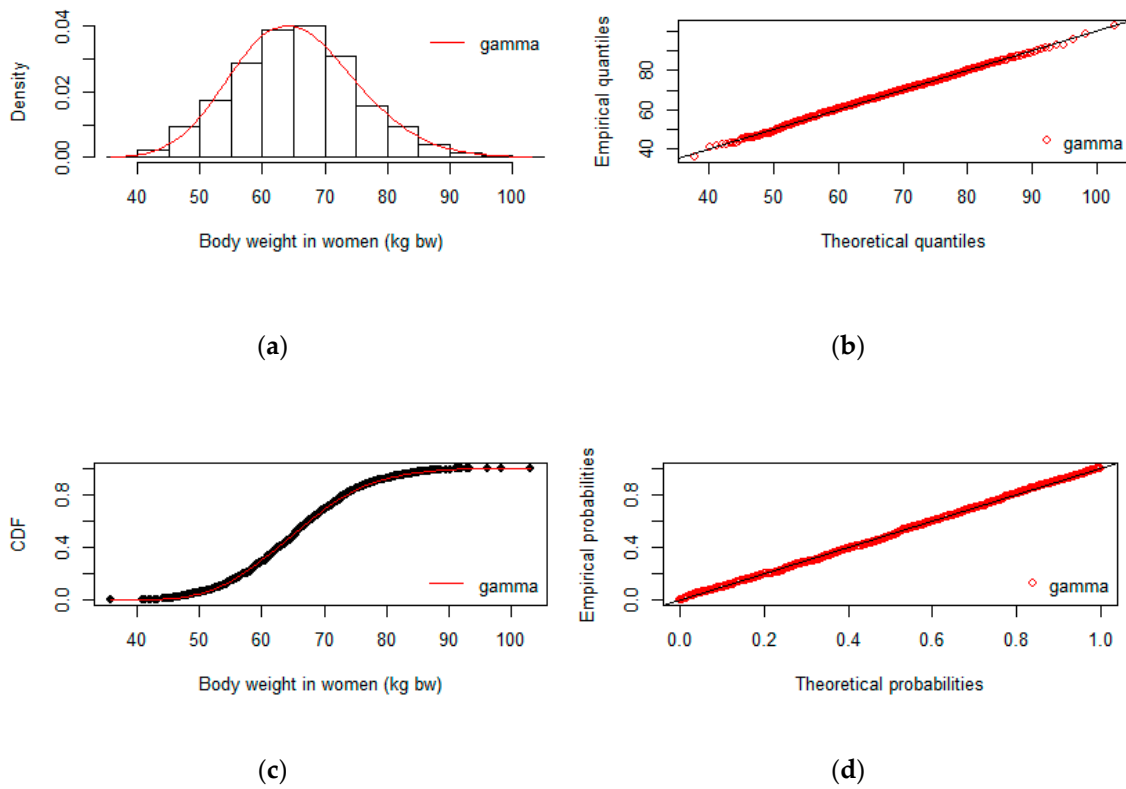

**Figure S8.** Goodness-of-fit plots for the distributions of the body weight in women. In order: (a) histogram of the empirical distribution data superimposed with the density function of the theoretical distribution; (b) plot of the quantiles of the theoretical fitted distribution (x-axis) against the empirical quantiles of the data (y-axis) (Q-Q plot); (c) plot of the cumulative density function of the fitted distribution (x-axis) against the empirical cumulative density function (y-axis) (P-P plot); (d) empirical density function of the data superimposed with the cumulative density function of the theoretical fitted distribution.

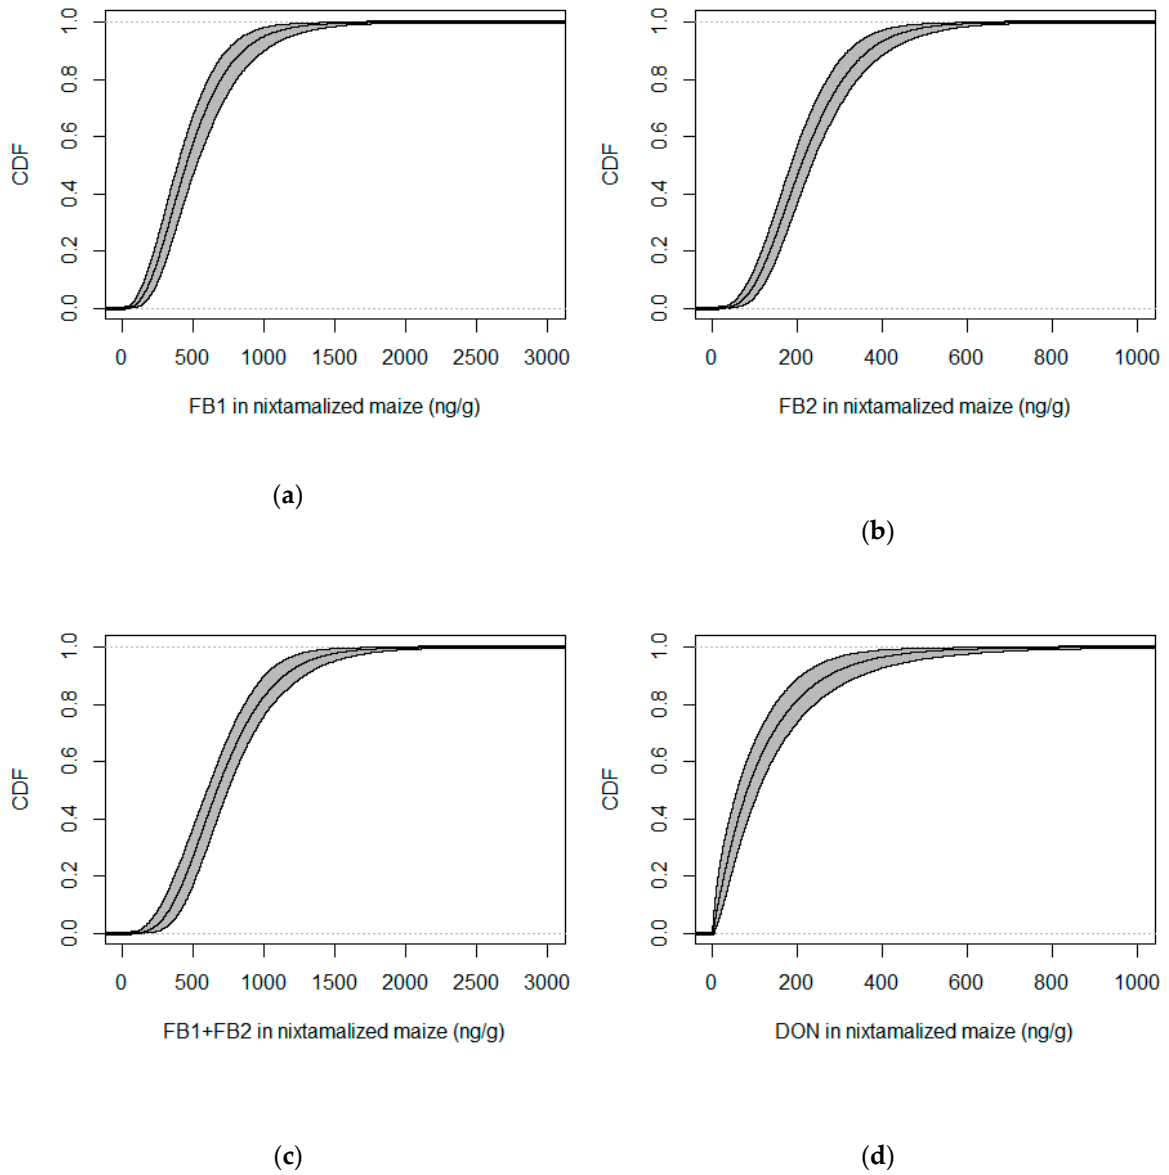

**Figure S9.** Cumulative distribution function (CDF) plots representing the mycotoxin concentration in the nixtamalized maize (a) FB1; (b) FB2; (c) FB1 + FB2; (d) DON. Uncertainty is indicated as the light gray band corresponding to a 95% uncertainty range.

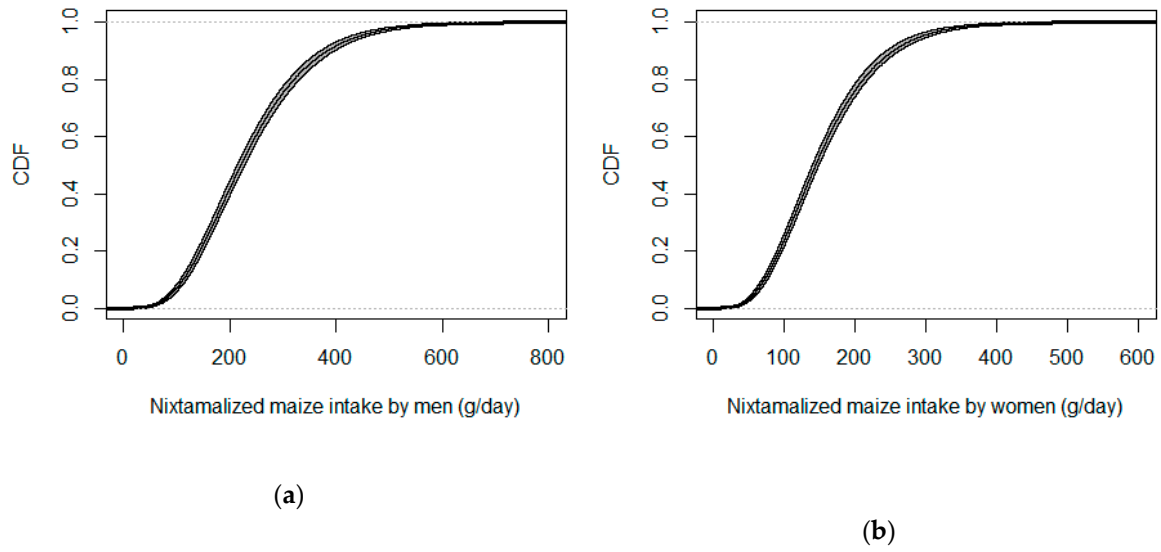

**Figure S10.** Cumulative distribution function (CDF) plots representing the nixtamalized maize intake as g per day, by (a) men and (b) women from the sum of nixtamalized maize products. Uncertainty is indicated as the light gray band corresponding to a 95% uncertainty range.

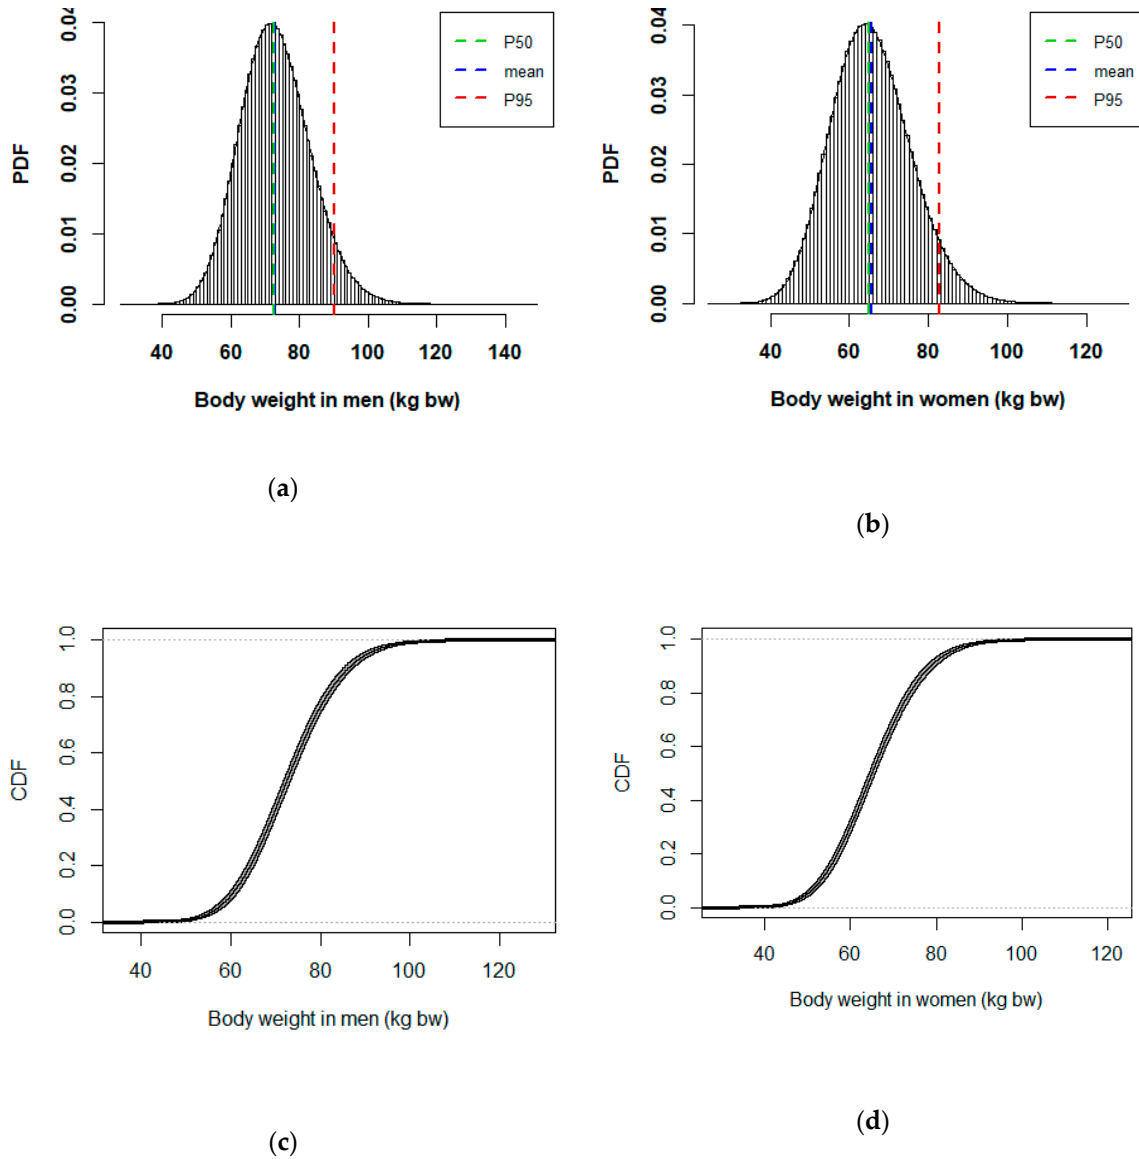

**Figure S11.** Probability density function (PDF) plots representing the body weight in: (a) men and (b) women; and cumulative distribution function (CDF) plots representing the body weight in: (c) men and (d) women; Uncertainty is indicated as the light gray band corresponding to a 95% uncertainty range.

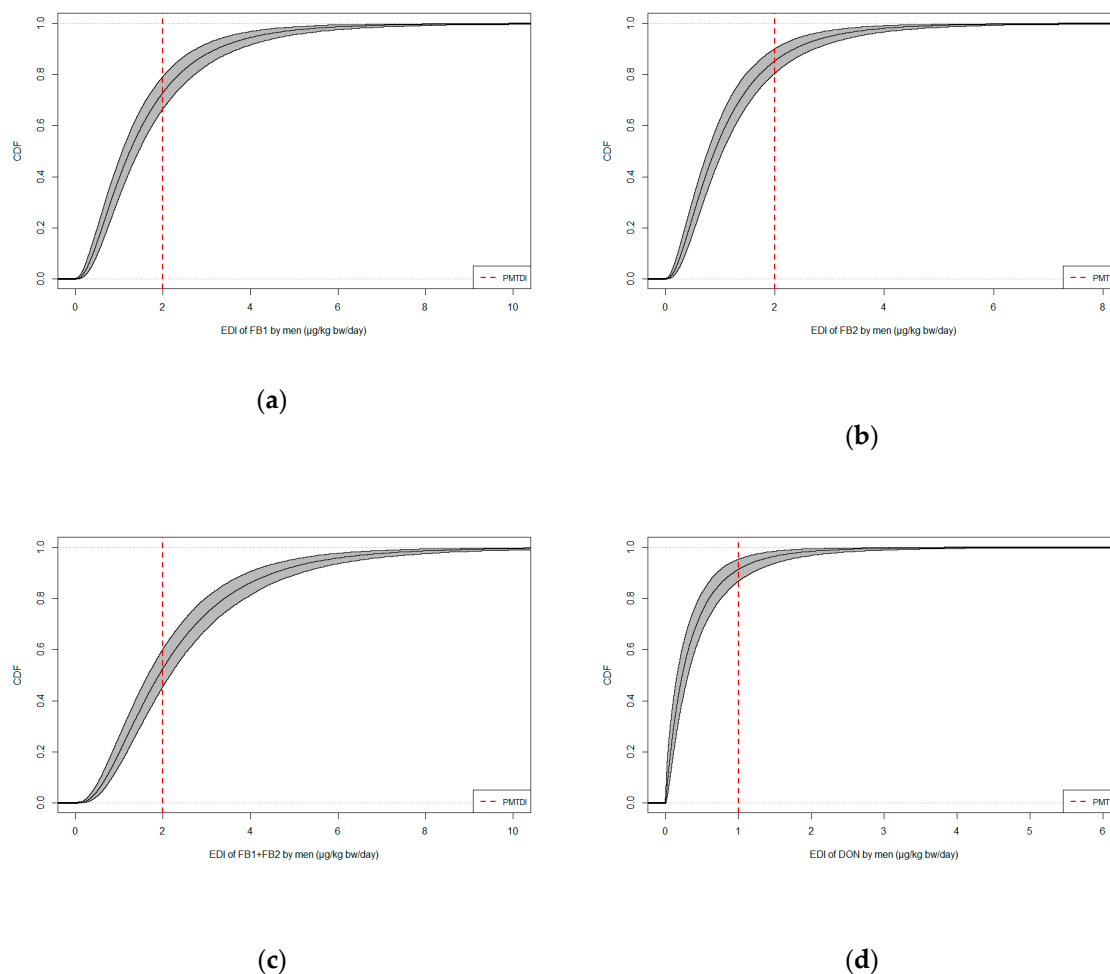

**Figure S12.** Cumulative distribution function (CDF) plots representing the mycotoxin Estimated Daily Intake (EDI) by men of (a) FB1; (b) FB2; (c) FB1+FB2; (d) DON from nixtamalized maize consumption. Uncertainty is indicated as the light gray band corresponding to a 95% uncertainty range. The Provisional Maximum Tolerable Daily Intake (PMTDI) is indicated as a red dotted line; according to JECFA fumonisins alone or in combination have a PMTDI of 2 µg/kg bw/day and DON of 1 µg/kg bw/day.

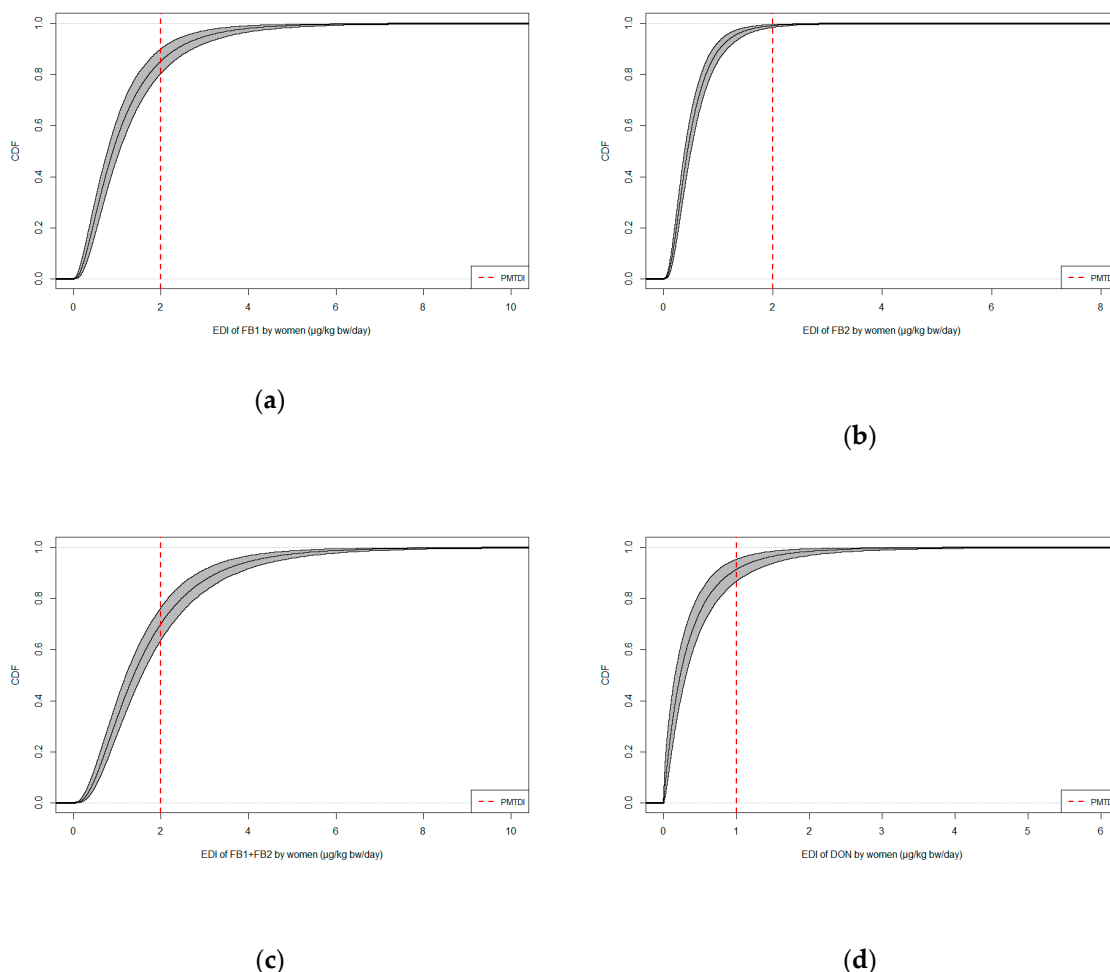

**Figure S13.** Cumulative probability plots representing the mycotoxin Estimated Daily Intake (EDI) by women of (a) FB1; (b) FB2; (c) FB1 + FB2; (d) DON from nixtamalized maize consumption. Uncertainty is indicated as the light gray band corresponding to a 95% uncertainty range. the Provisional Maximum Tolerable Daily Intake (PMTDI) is indicated as a red dotted line; according to JECFA fumonisins alone or in combination have a PMTDI of 2 µg/kg bw/day and DON of 1 µg/kg bw/day.

**Materials and Methods**

**Table S4.** Summary statistics for the consumption of maize by men and women reported by Wall-Martinez et al., [1].

| Group | Food <sup>2</sup> | Average<br>(g maize/person/day) | SD    | Distribution | Shape <sup>1</sup> | Scale <sup>1</sup> |
|-------|-------------------|---------------------------------|-------|--------------|--------------------|--------------------|
| Men   | Antojitos         | 46.67                           | 32.81 | gamma        | 2.02               | 23.06              |
|       | Chilaquiles       | 20.81                           | 15.94 | gamma        | 1.70               | 12.20              |
|       | Tacos             | 26.62                           | 20.04 | gamma        | 1.76               | 15.08              |
|       | Tortillas         | 142.9                           | 104.1 | gamma        | 1.88               | 75.83              |
| Women | Antojitos         | 30.57                           | 23.57 | gamma        | 1.68               | 18.17              |
|       | Chilaquiles       | 15.65                           | 10.95 | gamma        | 1.11               | 7.66               |
|       | Tacos             | 13.67                           | 12.93 | gamma        | 2.04               | 12.23              |
|       | Tortillas         | 94.2                            | 66.4  | gamma        | 2.01               | 46.80              |

<sup>1</sup> Shape and scale calculated from the average and SD reported by Wall-Martinez et al., [1]. <sup>2</sup> Food providing the largest amount of nixtamalized maize per person (g maize/person/day).

Supplementary Data—The computer code repository is available at: <https://doi.org/10.5281/zenodo.4031516>.

## References

1. Wall-Martínez, H., Ramírez-Martínez, A., Wesolek, N., Brabet, C., et al., Statistical analysis of corn consumption for improved mycotoxin exposure estimates for the population of Veracruz City, Mexico. *Food Additives & Contaminants: Part A* **2017**, *34*, 864–879.
